# Supplementary material for: Metabolomic Insight into Implications of Induction Chemotherapy Followed by Concomitant Chemoradiotherapy in Locally Advanced Head and Neck Cancer
Source: MDPI journal article supplement (doi:10.3390/ijms25010188), 2023-12-22
Supplement: s1 [file s1]

Supplementary Materials for

# Metabolomic Insight into Implications of Induction Chemotherapy Followed by Concomitant Chemoradiotherapy in Locally Advanced Head and Neck Cancer

Łukasz Boguszewicz <sup>1,\*</sup>, Agata Bielen <sup>2</sup>, Mateusz Cizek <sup>1</sup>, Agnieszka Skorupa <sup>1</sup>, Jolanta Mrochem-Kwarciak <sup>3</sup>, Krzysztof Skłodowski <sup>2</sup> and Maria Sokół <sup>1</sup>

<sup>1</sup> Department of Medical Physics, Maria Skłodowska-Curie National Research Institute of Oncology,

Gliwice Branch, 44-102 Gliwice, Poland; mateusz.cizek@gliwice.nio.gov.pl (M.C.); agnieszka.skorupa@gliwice.nio.gov.pl (A.S.); maria.sokol@gliwice.nio.gov.pl (M.S.)

<sup>2</sup> 1st Radiation and Clinical Oncology Department, Maria Skłodowska-Curie National Research Institute of Oncology, Gliwice Branch, 44-102 Gliwice, Poland; agata.bielen@gliwice.nio.gov.pl (A.B.)

<sup>3</sup> Analytics and Clinical Biochemistry Department, Maria Skłodowska-Curie National Research Institute of Oncology, Gliwice Branch, 44-102 Gliwice, Poland; jolanta.mrochem-kwarciak@gliwice.nio.gov.pl

\* Correspondence: lukasz.boguszewicz@gliwice.nio.gov.pl

**The characteristics of the acquired spectra, as well as the pulse sequence parameters.**

- NOESY (nuclear Overhauser effect spectroscopy)—an overview of all types of molecules;
- CPMG (Carr–Purcell–Meiboom–Gill)—information on only low-molecular-weight metabolites.
- DIFF (diffusion-edited)—mainly macromolecular signals.
- Two-dimensional (2D) JRES (J-resolved)—a visualization of scalar couplings and improved metabolite identification.

Table S1. NMR pulse sequence parameters.

| Pulse program       | NOESYGPPR1D | CPMGPR1D | LEDBPGPPR2S1D | JRESGPPRQF |
|---------------------|-------------|----------|---------------|------------|
| <b>TD</b>           | 65536       | 65536    | 65536         | 8192       |
| <b>SW</b> [ppm]     | 30          | 20       | 30            | 16.62      |
| <b>AQ</b> [sec]     | 2.73        | 4.09     | 2.73          | 0.62       |
| <b>D1</b> [sec]     | 4           | 4        | 4             | 2          |
| <b>D8</b> [sec]     | 0.01        | -        | -             | -          |
| <b>D16</b> [sec]    | -           | -        | 0.0002        | 0.0002     |
| <b>D20</b> [sec]    | -           | 0.0003   | 0.12          | -          |
| <b>D21</b> [sec]    | -           | -        | 0.005         | -          |
| <b>DS</b>           | 4           | 4        | 4             | 16         |
| <b>L4</b>           | -           | 126      | -             | -          |
| <b>NS</b>           | 32          | 64       | 64            | 1          |
| <b>DELTA1</b> [sec] | -           | -        | 0.11572488    | -          |
| <b>DELTA2</b> [sec] | -           | -        | 0.004172      | -          |

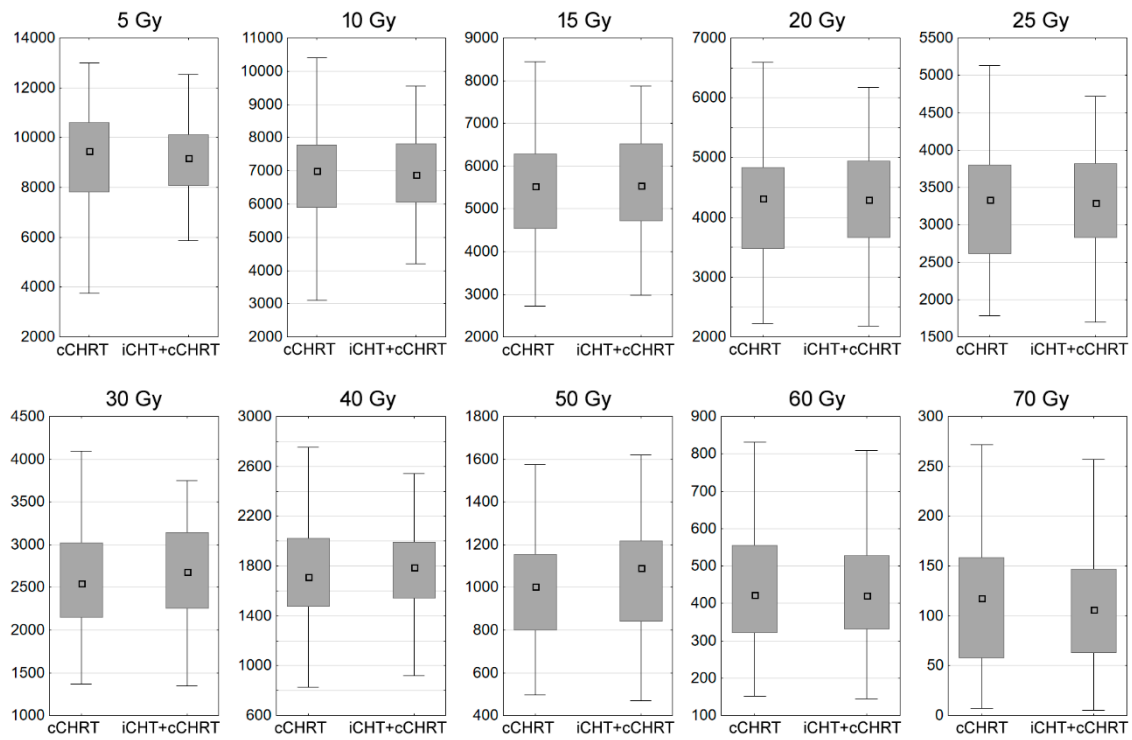

Figure S1. Box plot comparison of the tissue volumes receiving a particular dose of radiation. No statistically significant differences are observed. Point—median; box—25-75 percentile; whiskers—the minimum and maximum values.
